# Supplementary material for: Animal models of maternal high fat diet exposure and effects on metabolism in offspring: a meta‐regression analysis
Source: PubMed Central journal article supplement (PMC5434919; doi:10.1111/obr.12524), 2017-03-30
Supplement: OBR-18-673-s007.pdf [file OBR-18-673-s007.pdf]

Animal models of maternal high fat diet exposure and effects on metabolism in offspring: A meta-regression analysis.

Ribaroff GA, Wastnedge E, Drake AJ, Sharpe RM, Chambers TJG.

Supplementary figures and table

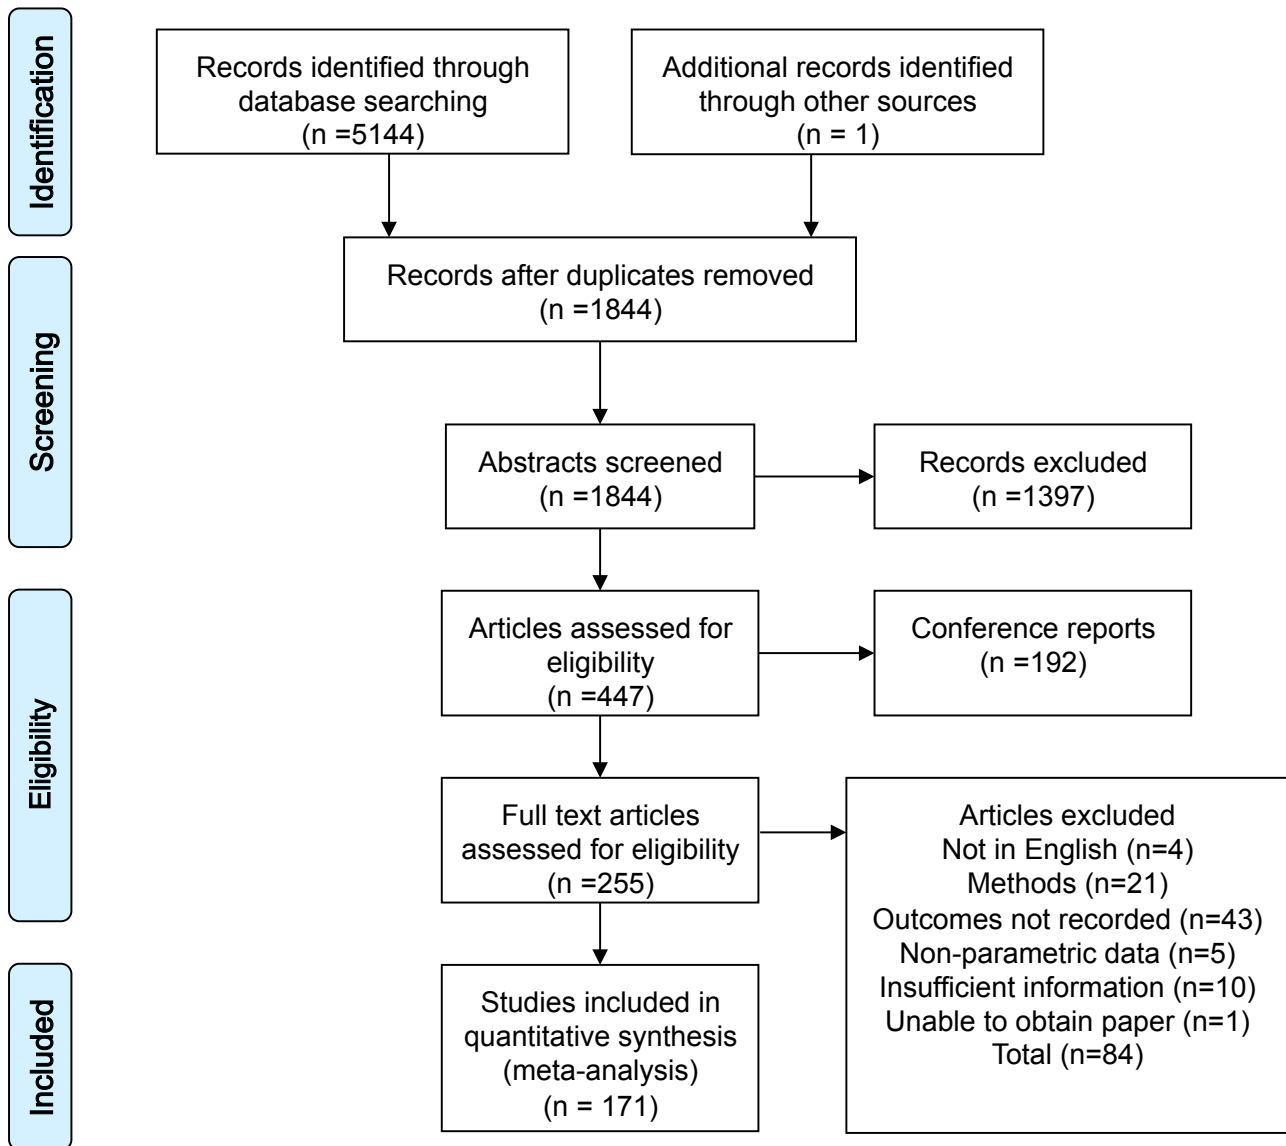

Figure S1: PRISMA chart demonstrating the process for selection of articles

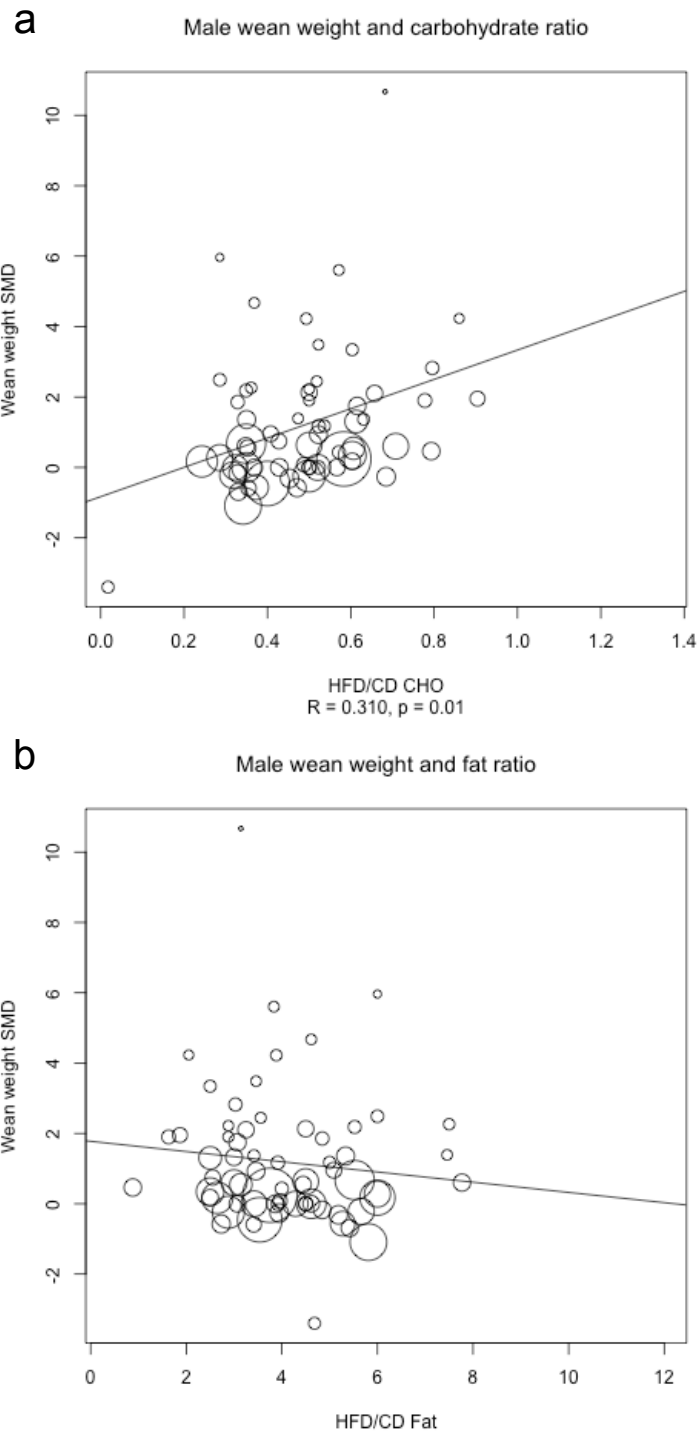

**Figure S2: Correlations between (a) carbohydrate and (b) fat ratio between intervention and control diets and weaning weight in offspring.** Points indicate individual studies. The size of the point is proportional to the inverse square root of the variance in the standardized mean difference of wean weight calculated for each study. A linear model for the fit between the macronutrient ratio and the weaning weight is indicated on each graph. In (a) the correlation between the ratio of carbohydrate content of the diets and wean weight was significant when assessed by Spearman's rank. There was no significant correlation between fat content ratio and wean weight in male offspring.

**Figure S3: Metabolic outcomes in the offspring of females exposed to HFD: forest plots from studies where male and female data combined.** (a) birthweight, (b) glucose, (c) weaning weight, (d) Insulin, (e) final body weight, (f) adiposity, (g) cholesterol, (h) triglycerides, (i) leptin. In the TOTAL model, estimated SMD and 95% confidence intervals are presented as a summary of all studies.  $k$  refers to the number of studies included. The significance of the effect size was assessed by random-effects model analysis. Explanation for heterogeneity was explored by meta-regression by including various moderating factors into the random-effects model. These included: *Nesting* - the use of statistical procedures to account for non-independence of animals from the same litter; *Randomisation* - the random assignment of animals to each intervention group; *CD:HFD ratio* of macronutrients, fat, Carbohydrate (CHO) and Protein, *Cafeteria diet* - the use of choice diet or supplementation of standard diets with palatable energy-rich foods, *species* and *method* by which the outcome was assessed in the studies. Estimates for the SMD and 95% confidence intervals are presented for these models along with the residual heterogeneity unaccounted for in the model (the  $I^2$  beneath each model).

**a**

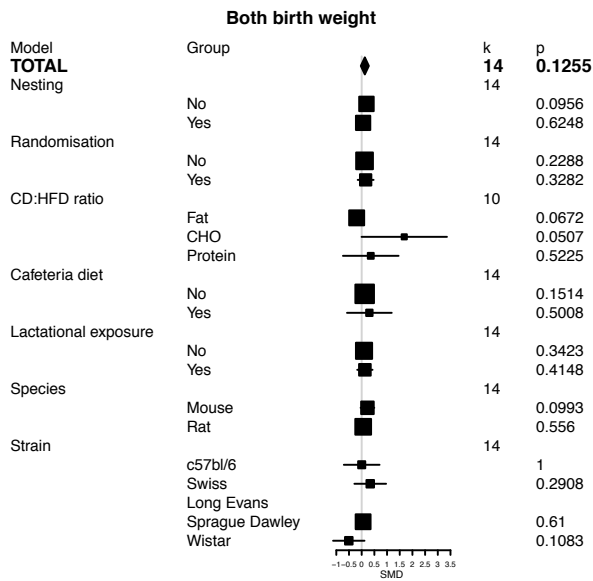

**b**

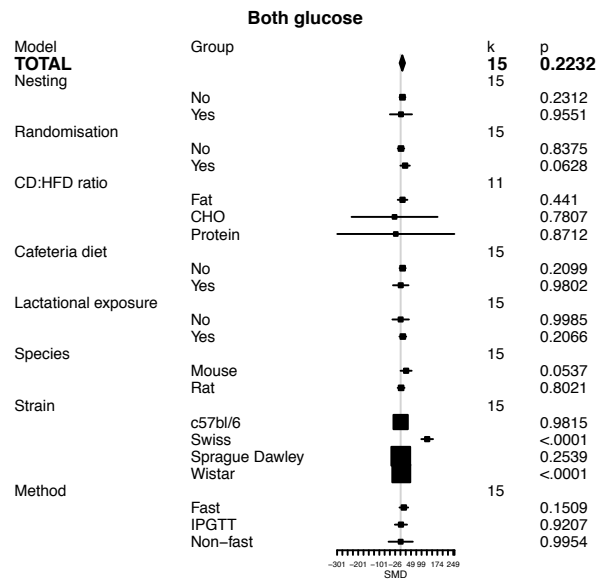

**c**

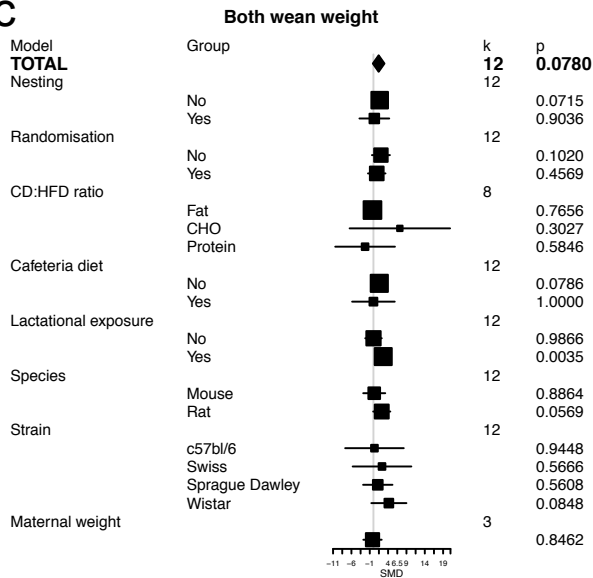

**d**

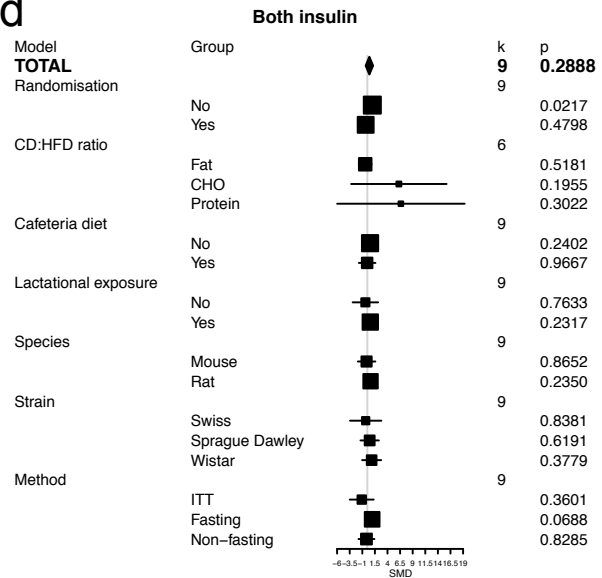

**e**

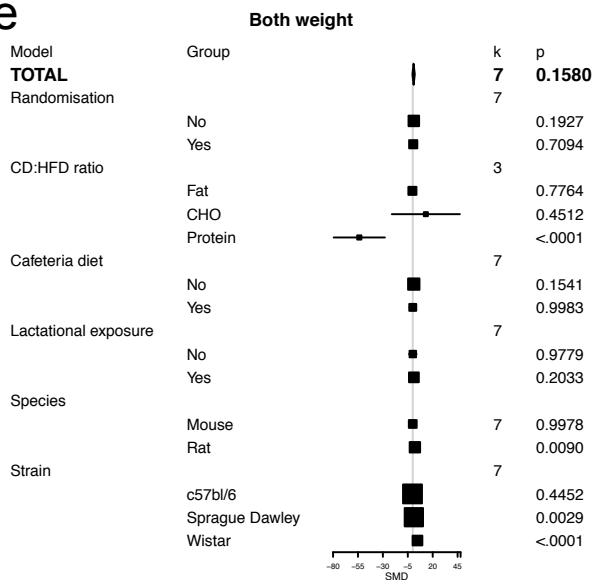

**f**

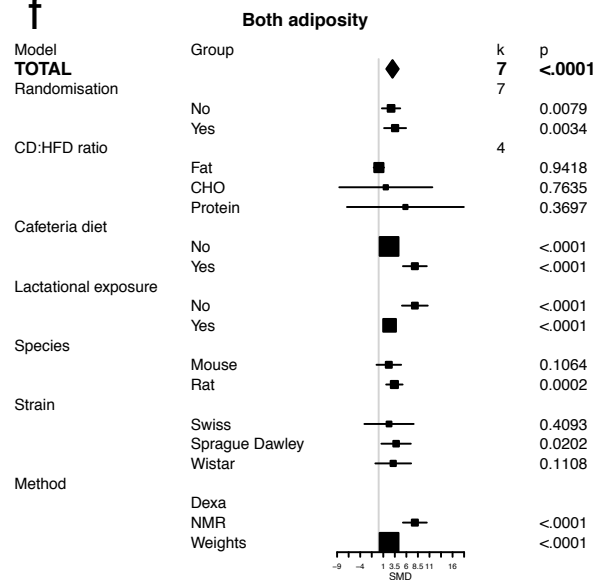

Figure S3: forest plots from studies where male and female data combined

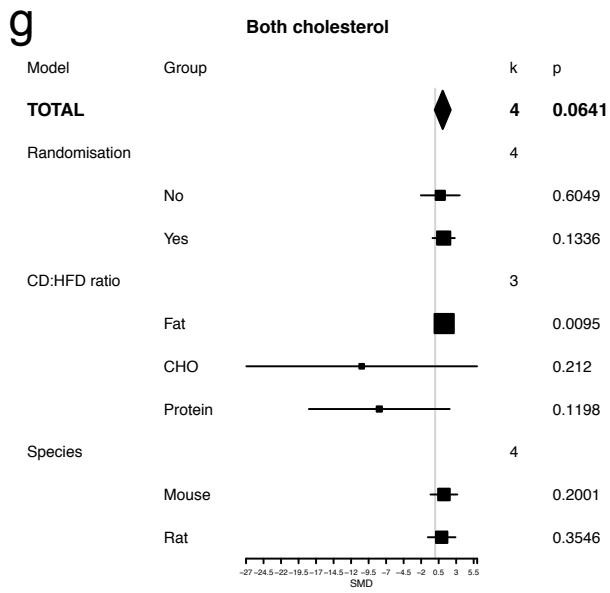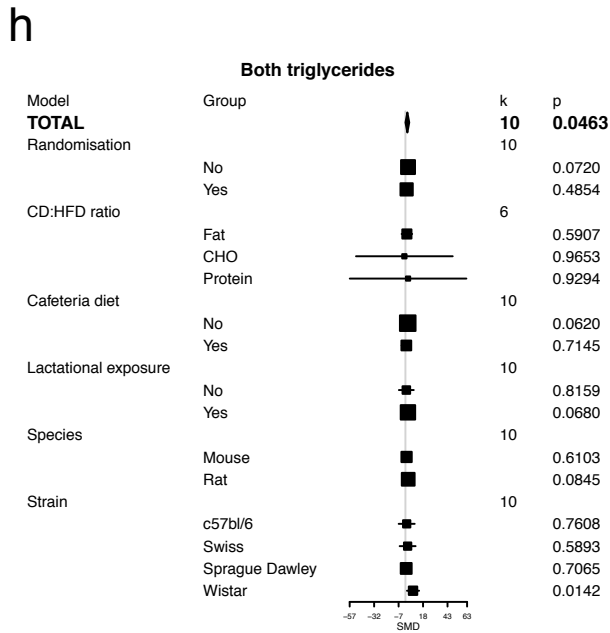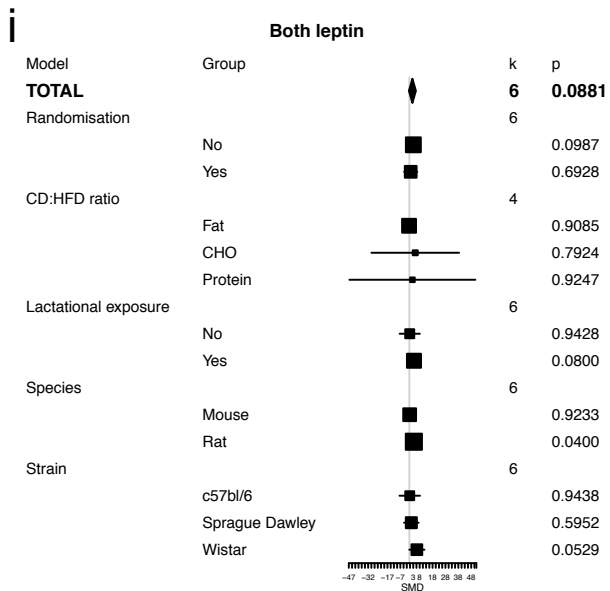

Figure S4: Forest plots for male and female leptin. (a) Male offspring, (b) female offspring. In the TOTAL model, estimated SMD and 95% confidence intervals are presented as a summary of all studies. *k* refers to the number of studies included. The significance of the effect size was assessed by random-effects model analysis. Explanation for heterogeneity was explored by meta-regression by including various moderating factors into the random-effects model. These included: *Nesting* - the use of statistical procedures to account for non-independence of animals from the same litter; *Randomisation* - the random assignment of animals to each intervention group; *CD:HFD ratio* of macronutrients, fat, Carbohydrate (CHO) and Protein, *Cafeteria diet* - the use of choice diet or supplementation of standard diets with palatable energy-rich foods, *species*, *maternal weight* - an approximation for gestation weight gain taken as the ratio change in weight from pre mating to post lactation. Estimates for the SMD and 95% confidence intervals are presented for these models along with the residual heterogeneity unaccounted for in the model (the  $I^2$  beneath each model).

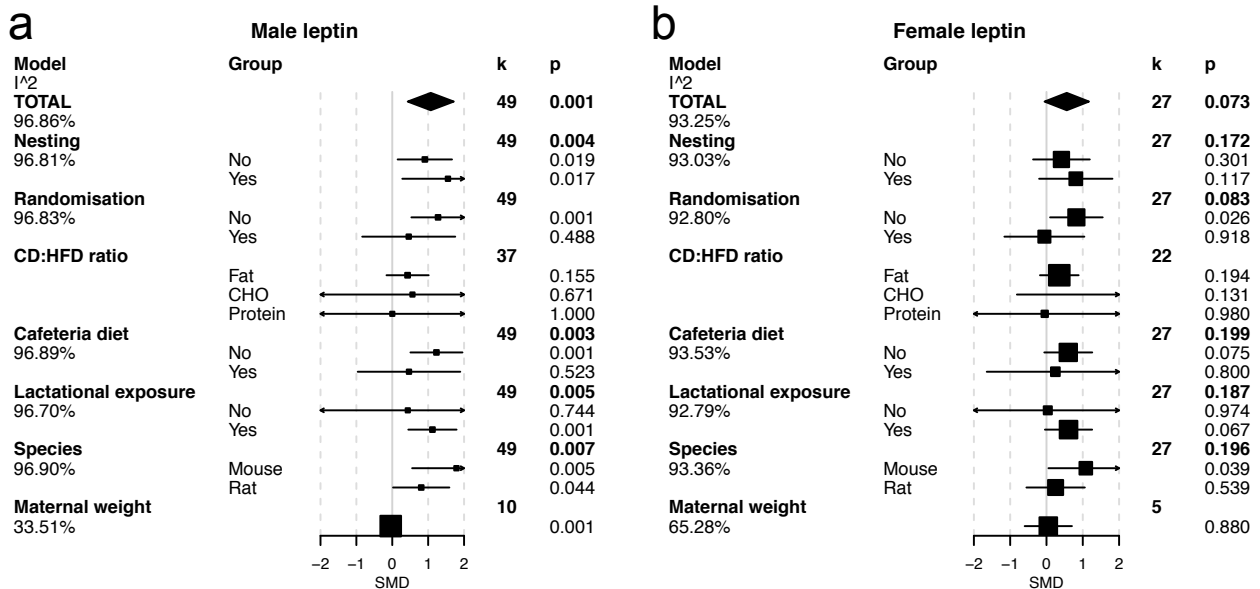

**Figure S5: Funnel plots demonstrating publication bias in the metabolic outcomes reported in studies of offspring of mothers maintained on HFD.**

**a**

Male birth weight

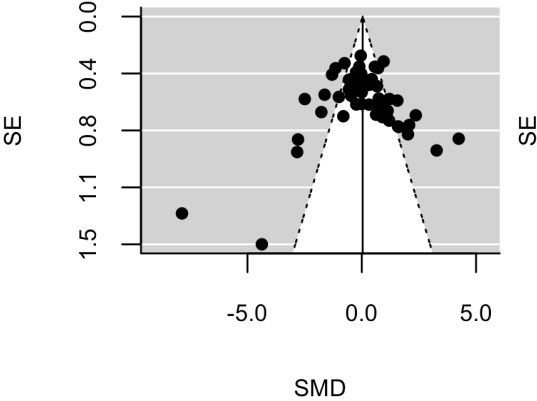

**b**

Female birth weight

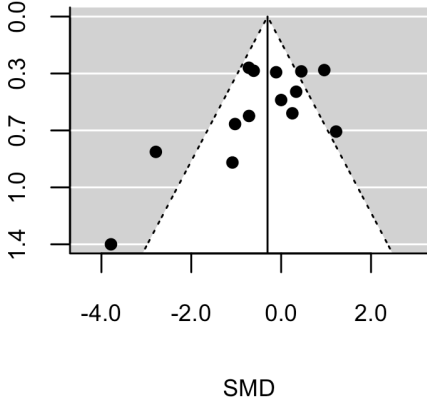

**c**

Male wean weight

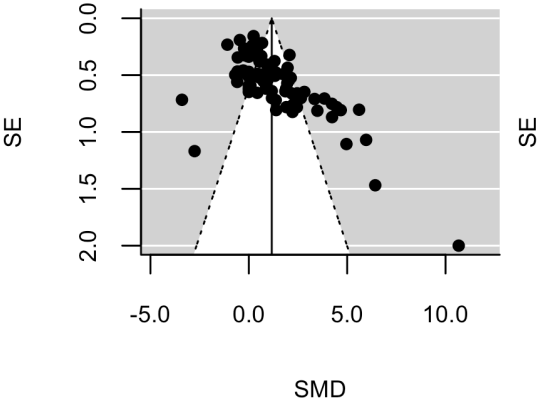

**d**

Female wean weight

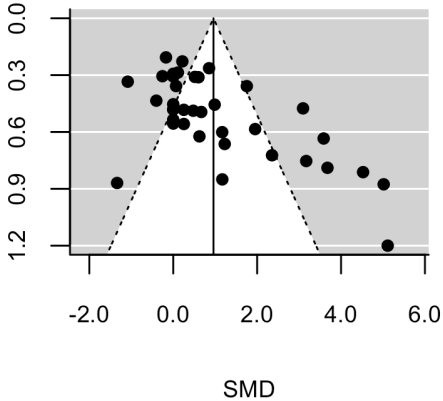

**e**

Male weight

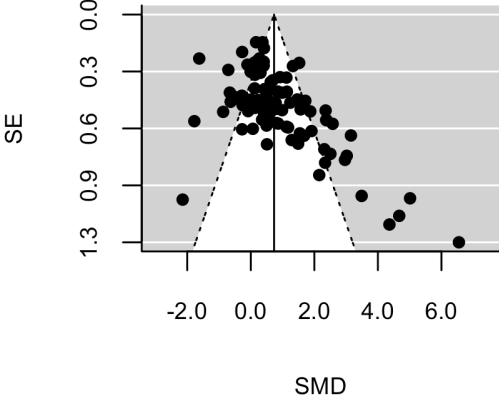

**f**

Female weight

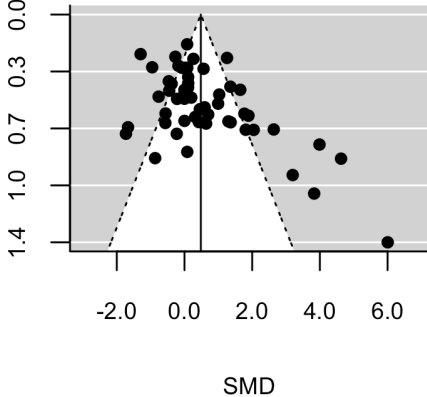



**f** Male glucose

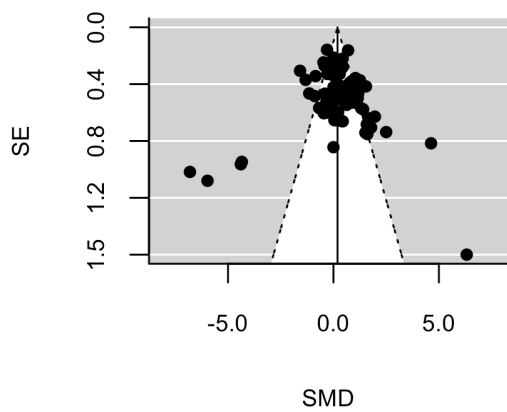

**g** Female glucose

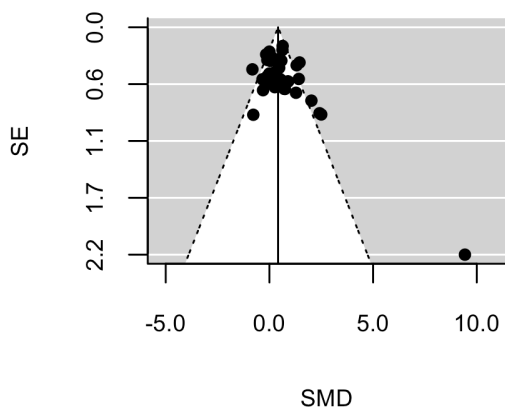

**h** Male insulin

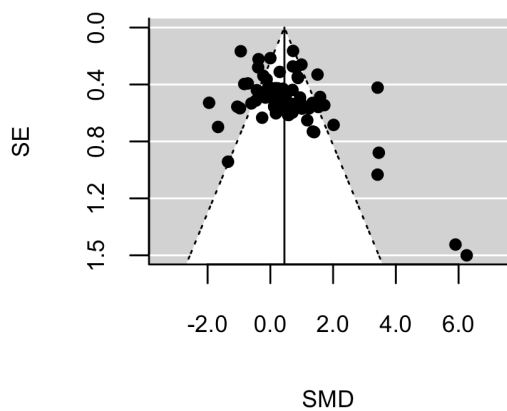

**i** Female insulin

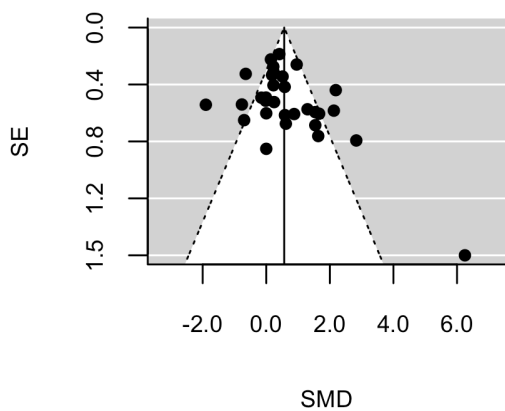

**k** Male cholesterol

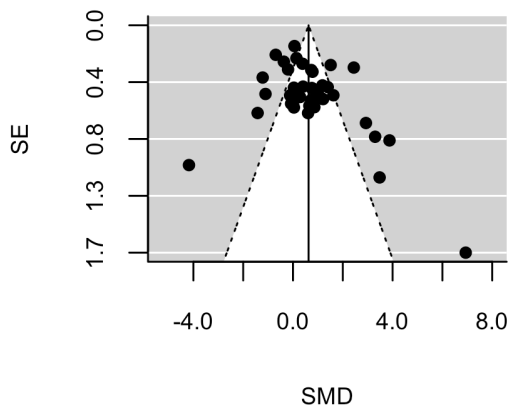

**l** Female cholesterol

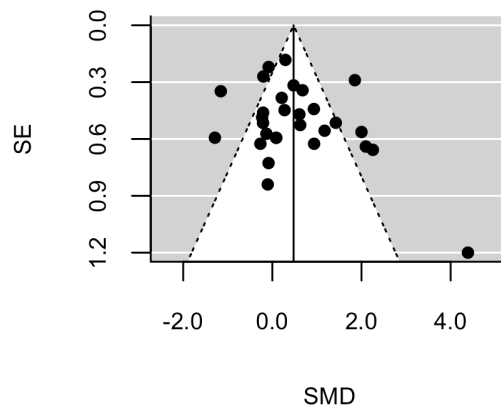

**m** Male triglycerides

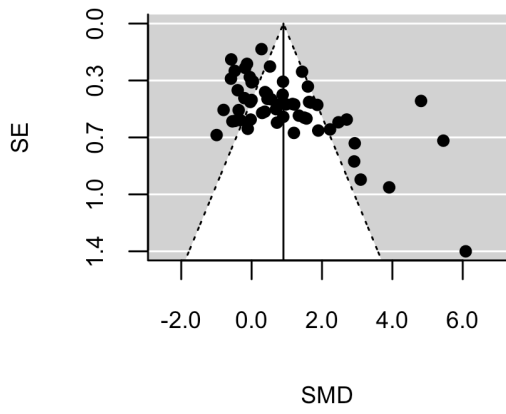

**n** Female triglycerides

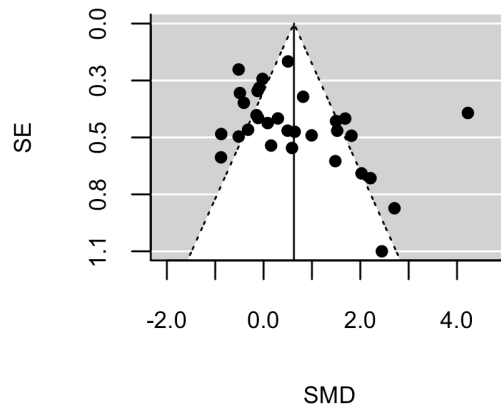

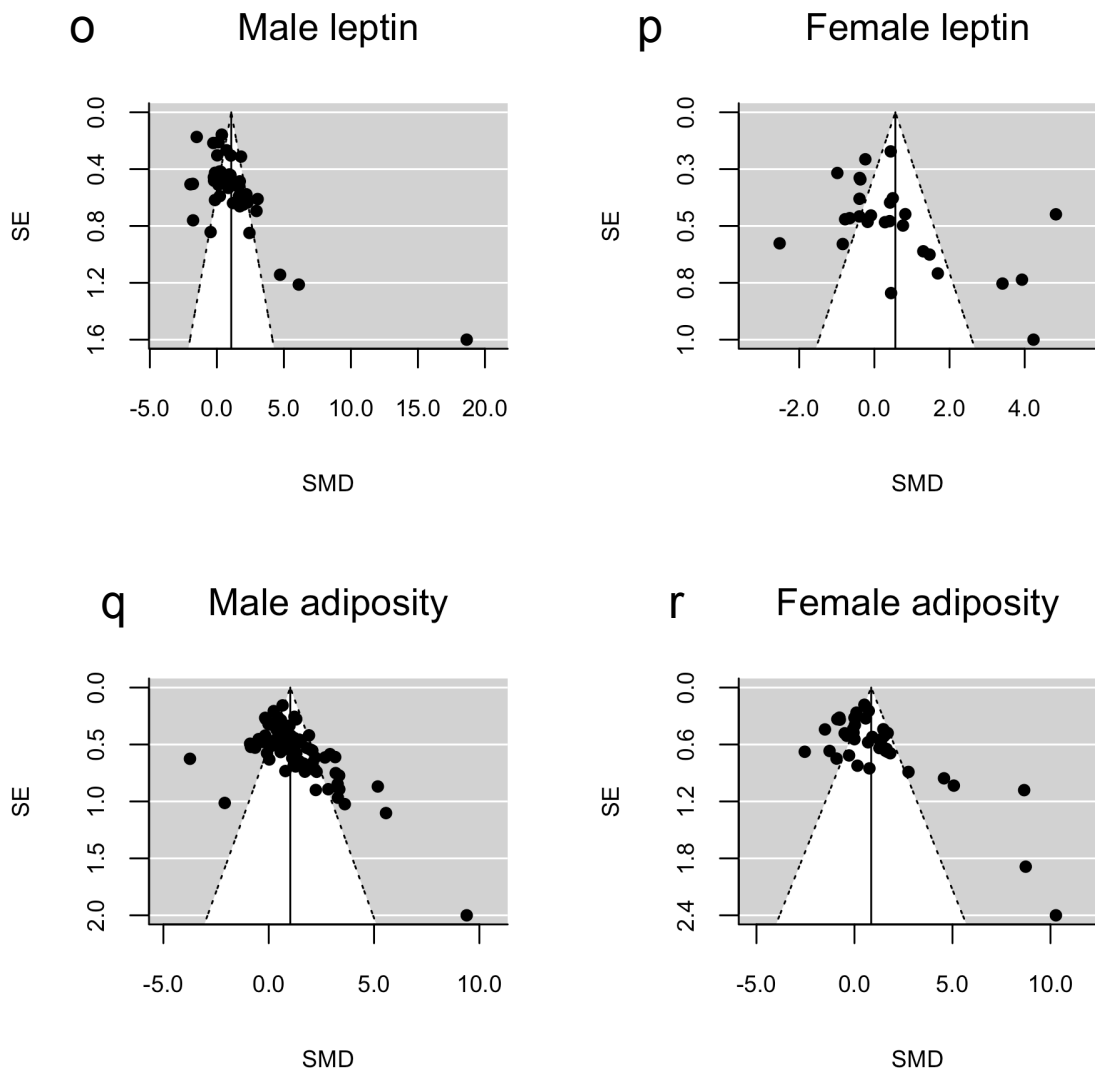

Table S1: Egger's tests for publication bias

Egger's test for publication bias

|             | Male   |                   | Female |                   |
|-------------|--------|-------------------|--------|-------------------|
|             | z      | p                 | z      | p                 |
| Birthweight | -1.509 | 0.131             | -2.670 | <b>0.008</b>      |
| Wean weight | 8.119  | <b>&lt; .0001</b> | 5.101  | <b>&lt; .0001</b> |
| Weight      | 7.365  | <b>&lt; .0001</b> | 5.003  | <b>&lt; .0001</b> |
| Adiposity   | 6.782  | <b>&lt; .0001</b> | 6.927  | <b>&lt; .0001</b> |
| Glucose     | -0.641 | 0.522             | 3.463  | <b>0.001</b>      |
| Insulin     | 4.170  | <b>&lt; .0001</b> | 2.995  | <b>0.003</b>      |
| Cholesterol | 2.802  | <b>0.005</b>      | 1.891  | 0.059             |
| Trigs       | 5.144  | <b>&lt; .0001</b> | 2.520  | <b>0.012</b>      |
| Leptin      | 7.306  | <b>&lt; .0001</b> | 2.919  | <b>0.004</b>      |
